# Supplementary material for: A Web-Based Application to Monitor and Inform about the COVID-19 Outbreak in Italy: The {COVID-19ita} Initiative
Source: MDPI journal article supplement (doi:10.3390/healthcare10030473), 2022-03-03
Supplement: s1 [file s1]

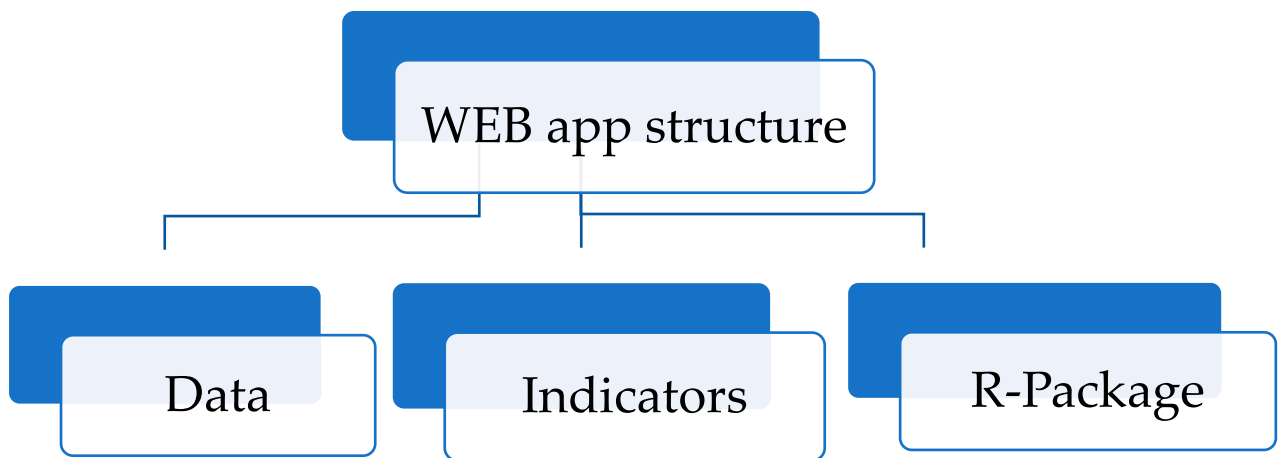

**Figure S1.** Web app structure handling the Covid-19 official data, the epidemic indicators, and the COVID-19ita R package providing the implementation of the web application together with a directly usable R version of the official data.

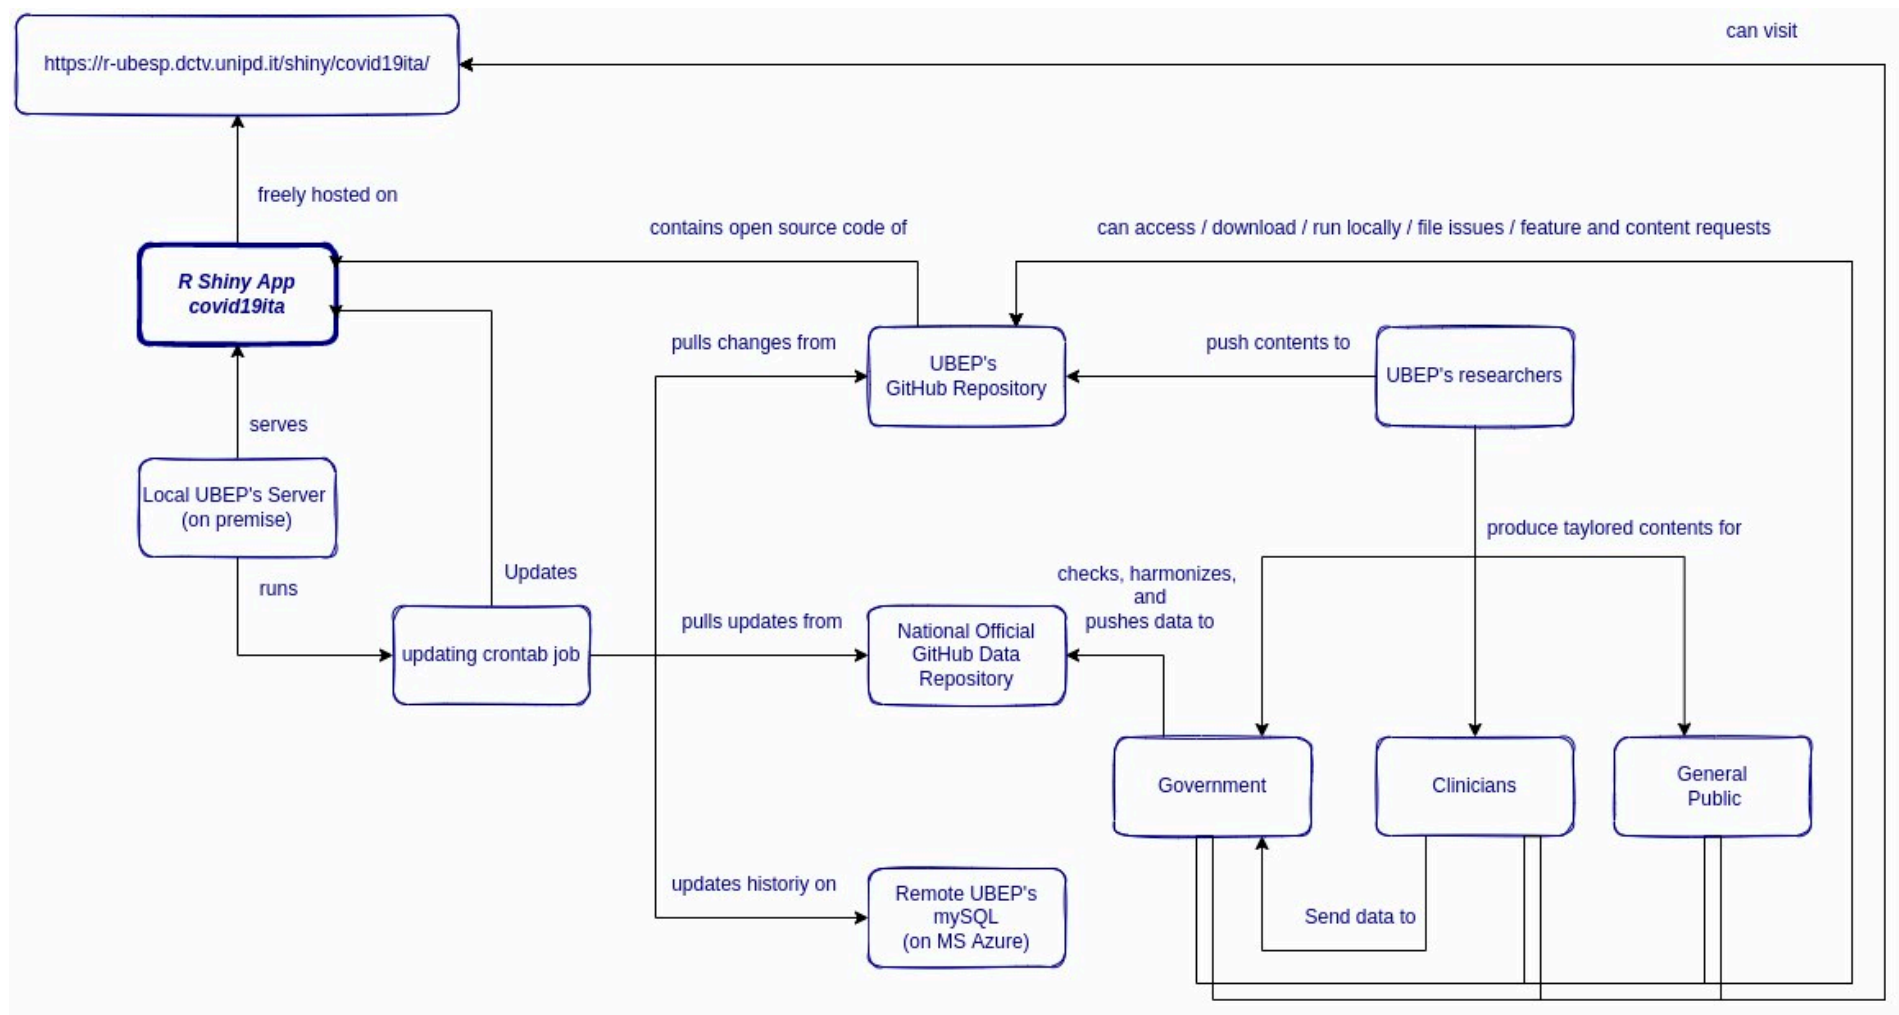

**Figure S2.** WEB app structure concerning relations with R code, data, environment and storing systems.
